# Supplementary material for: Overview of Virus Metagenomic Classification Methods and Their Biological Applications
Source: Front Microbiol. 2018 Apr 23;9:749. doi: 10.3389/fmicb.2018.00749 (PMC5924777; doi:10.3389/fmicb.2018.00749)
Supplement: Supplementary file 1 [file DataSheet1.XLSX]

## Sheet: Information of virus workflows-
Name	Authors	Publication date	Doi	Goal	Unique feature	Limitation	Target organism(s)	Method	Search algorithm	Sequence type	DB (classification)	Filter algorithm	DB (filter)	Classification level	Can detect novel/unknown viruses?	Steps	GUI?	Visualizes results?	Runtime	Accepts datatypes	Tested w/ read length	Raw reads/contigs	HPC or PC?	Freely available?	Licence	User manual	Computer platform	Sequencing platform	Reproducibility	Link (software)	Other tools/pipelines tested	Tested by (tools)	Independent benchmarks	Described by	Validation	Performance	Up-to-date	Citations (Scopus)	Software used	Citations (Google Scholar, 2017-03-28)	Title of publication	Applications_medical	Applications_biodiversity	Application_discovery
PathSeq	Kostic et al.	2011-05-01	10.1038/nbt.1868	discover microorganisms in human tissue	good filter for human sequences	computationally expensive (compared to most other NGS analyses), limited to databases	pathogens	similarity	BLAST	nt, aa	NCBI viruses, fungi, bacterial and archaeal, and NCBI nr	MAQ, Megablast, BLASTN	1000 Genomes Project female reference, Ensembl Homo sapiens cDNA, human genome and transcriptome BLAST database (NCBI), 3 assembled human genomes from NCBI, NCBI Homo sapiens RNA database, Ensembl human genome reference	species	yes	PFFAS	no	no	?	?	76, 100, 101 bp	reads	HPC	yes	MIT (modified)	-	Linux, cloud (Amazon EC2, Apache Hadoop)	Any	medium-high (high in cloud, medium for self-installation)	https://www.broadinstitute.org/software/pathseq/	-	READSCAN, RINS	-	-	-	SEN: up to 99% for no mutations, 50% for 20% mutated; SEN: 81-86-81-79-65-21-2-0% , SPEC: 100% (0-1-5-10-20-30-40-50% mutated, Readscan)	no (only date on website is copyright 2010)	91	Python, Java, C++, C, Hadoop, MAQ, Megablast, Blast, Velvet, RepeatMasker	158	PathSeq: software to identify or discover microbes by deep sequencing of human tissue	Medical: diagnostics	Biodiversity: human pathogens	Discovery: aa search, broad DB
MEGAN4	Huson et al.	2011-06-20	10.1101/gr.120618.111	taxonomic and functional annotation of metagenomics reads	LCA and visualization	needs mapping program (if not DIAMOND, it's probably a slow one)	metagenomes	similarity	BLAST	nt, aa	NCBI nt/nr	-	-	species	limited	S-pp	yes	yes	?	?	35-800 bp	reads/contigs	?	for academic use	-	http://ab.inf.uni-tuebingen.de/software/megan4/	Any	Any	high	http://ab.inf.uni-tuebingen.de/software/megan4/	-	ProViDE, Taxy-Pro, MetLab, IMSA+A	Peabody et al. (2015), Lindgreen et al. (2016), Bazinet & Cummings (2012)	RIEMS, Fancello et al. (2012)	-	??? 22-100% (short to long reads), SEN: 57-65-73-84-85% (MetLab, species-kindgom); SEN: 30-80% (species+BLASTN-superkingdom-RAPSearch2), SEN: <10-40% (clade exclusion), PREC: ~15-70% (clade exclusion, BLASTN-RAPSearch2; Peabody), SEN: 30-55%, SPEC: 90-99%, MCC: 30-43% (genus-phylum, Lindgreen), SEN: 43-90, PREC: 78-100% (Bazinet & Cummings), SEN: 57-33, PREC: 100-100 (Diamond-Blastn, IMSA+A)	no (version 6 is out)	?	Java	752	Integrative analysis of environmental sequences using MEGAN4	Medical: diagnostics	Biodiversity: any metagenome	Discovery: aa search, broad DB
VIROME	Wommack et al.	2012-07-30	10.4056/sigs.2945050	viral metagenome analysis	extensive virome analysis	only viruses, mostly marine(?)	virus	similarity	BLAST	aa	UniRef 100 peptide, SEED, ACLAME, COG, GO, KEGG, MGOL, CAMERA, UniVec	BLASTn. tRNAscan-SE	"a rRNA subject database"	-	no	PFS	yes (webservice)	yes (charts, tables)	?	"fasta & qual", fastq, sff	no	reads	HPC	use yes, download no	-	http://virome.dbi.udel.edu/, Tutorial videos	Any (webservice)	454	high	http://virome.dbi.udel.edu/app/#view=home	-	-	-	Fancello et al. (2012)	-	?	no (website is online, but no date is mentioned)	29	Adobe Flex, MySQL, Blast, tRNA scan SE, MetaGene Annotator, CD-Hit 454	59	VIROME: a standard operating procedure for analysis of viral metagenome sequences	Medical: diagnostics	Biodiversity: viruses (mostly marine)	Discovery: aa search, broad DB
IMSA	Dimon et al.	2013-05-23	10.1371/journal.pone.0064546	filter search	action files	requires selection of mapping tool and databases	any	similarity	BLAST	nt	user-defined "universal database", (NCBI nt?)	Bowtie, BLAT, BLAST	user-defined (human genome)	species	no	FS	no	yes (TaxMap)	hours	Illumina, 454	50 bp, 70 bp single-end, 150 bp paired-end	reads	scalable from desktop to SUN Grid cluster (tested with Grid)	yes	-	https://sourceforge.net/projects/arron-imsa/files/IMSA_UserManual_v2.pdf/download	Linux, Mac OS	454, Illumina	medium-high (Python scripts with few dependencies)	https://sourceforge.net/projects/arron-imsa/?source=directory	-	ClinicalPathoScope	-	-	-	SEN: 86-91%	no (last update 17-4-2014)	7	Python, Blast, Bowtie2, Blat	10	IMSA: Integrated Metagenomic Sequence Analysis for Identification of Exogenous Reads in a Host Genomic Background	Medical: diagnostics, faster (probably possible to deliver result in one day)	Biodiversity: any metagenome	-
VirusHunter	Zhao et al.	2013-10-01	10.1371/journal.pone.0078470	virus discovery	novel virus identification	focused on 454	virus	similarity	BLAST	nt, aa	NCBI nt/nr	BLASTn	host genome; default: human (NCBI 1000 genomes?)	species	yes	PFS(S)	no	no	?	454	no	reads	HPC	non-profit	register	-	Linux	454	low	https://www.ibridgenetwork.org/#!/profiles/9055559575893/innovations/103/	-	-	-	-	EM, serology (hemagglutanation inhibition)	?	no (website only states "Launched: April 2012")	28	Perl, MySQL, Blast, CD-HIT, RepeatMasker	46	Identification of Novel Viruses Using VirusHunter -- an Automated Data Analysis Pipeline	Medical: diagnostics, discover remote homology	Biodiversity: viruses	Discovery: aa search, broad DB
SLIM	Cotten et al.	2014-04-02	10.1371/journal.pone.0093269	reliable detection of viruses from clinical samples and recovery of genomes	iterative mapping and de novo assembly (also in RIEMS)	BLAST (slow and cannot classify everything)	virus	similarity	BLAST	nt	GenBank entries of 2000-500,000 bp long	-	-	species	limited	PAS	no	no	hours of searching, hours for assembly per sample (almost 10x faster than BLAST)	Illumina	150 paired-end	reads	PC	upon request	-	-	Linux, Mac OS	Illumina	low-medium (some dependencies, no free download, changing NR database, …)	-	-	-	-	-	RT-PCR	?	new version in use	14	Python, BLAST, QUASR, MEGAN, BWA, SPAdes, MUMmer	27	Full Genome Virus Detection in Fecal Samples Using Sensitive Nucleic Acid Preparation, Deep Sequencing, and a Novel Iterative Sequence Classification Algorithm	Medical: diagnostics, faster (probably possible to deliver result in one day)	Biodiversity: viruses	-
VirFind	Ho & Tzanetakis	2014-10-01	10.1016/j.virol.2014.09.019	virus detection and discovery	automated, universal web-based virus detection and discovery	only web and viruses; limited detection of novel viruses	virus	similarity	BLAST	nt, aa	GenBank nt, GenBank virus proteins	Bowtie2	custom?	species	limited	PFAS(S)	yes (webservice)	no	~ 70 h	sff, fastq, fasta	> 90	reads	64 CPU-HPC	use yes, download no	-	-	Any (webservice)	Any	high (as long as the server is up, web-based and references in article)	http://virfind.org/j/	-	-	-	VIP	-	?	yes (website updated 20-02-2016)	7	fastx-toolkit, seq_crumbs, Bowtie2, Velvet, Blast, CAP3, Python	31	Development of a virus detection and discovery pipeline using next generation sequencing	-	Biodiversity: viruses	Discovery: aa search, broad DB
Giant Virus Finder	Kerepesi & Grolmusz	2015-12-14	10.1007/s00705-015-2720-8	finding giant viruses in metagenomes	giant viruses	slow, very targeted	virus	similarity	BLAST	nt	NCBI nt + custom reference genomes	-	-	species	no	S	no	no	~30 CPU hours?	anything that BLAST uses?	no	reads	HPC	yes	GNU GPL	http://pitgroup.org/public/giant-virus-finder/latest/README	Linux, Mac OS	Any	medium	http://pitgroup.org/giant-virus-finder	-	-	-	-	-	?	yes	?	Perl, Python, BLAST	3	Giant viruses of the Kutch Desert	Medical: diagnostics	Biodiversity: giant viruses	-
"Unknown pathogens from mixed clinical samples"	Gong et al.	2016-03-17	10.1371/journal.pone.0151495	pathogen detection in mixed samples	mixed samples	hard to reproduce: CLCbio	pathogens	similarity + phylogeny	BLAST	nt	NCBI nt	-	-	species	no	PSAPh-pp	no	yes (histogram, tables, coverage map, genetic variants, trees)	interactive	Illumina	no	reads	?	no	-	-	Windows?	Illumina	very low	-	-	-	-	-	PCR, ELISA	?	-	?	CLC Genomics Workbench (7.5), Blast, Bowtie2, Clustal Omega, MEGA6, SimPlot	1	A Next-Generation Sequencing Data Analysis Pipeline for Detecting Unknown Pathogens from Mixed Clinical Samples and Revealing Their Genetic Diversity	Medical: diagnostics, faster (probably possible to deliver result in one day)	Biodiversity: any metagenome	-
VirusSeeker	Zhao et al.	2017-01-10	10.1016/j.virol.2017.01.005	virus discovery and virome composition analysis in a single package	virus discovery and virome composition analysis in a single package	BLAST-based (on HPC)	virus	similarity	BLAST	nt, aa	NCBI viruses (manually curated)	BWA-MEM, MegaBlast, BLASTn, BLASTx	NCBI Bacteria, NCBI NT, NCBI NR (respectively)	species	yes	PSF	no	no	?	paired-end fastq	250	reads	HPC	yes	-	https://wupathlabs.wustl.edu/virusseeker/usage/	Linux	Paired-end Illumina	medium	https://wupathlabs.wustl.edu/virusseeker/	VirFind	-	-	-	-	?	yes	?	Perl, SLURM, BLAST, MegaBLAST, BWA-MEM, cutadapt, ea-utils, PRINSEQ, CD-HIT, Tantan, RepeatMasker, Newbler, Phrap	1	VirusSeeker, a computational pipeline for virus discovery and virome composition analysis	Medical: diagnostics	Biodiversity: viruses	Discovery: aa search
VirusFinder	Wang et al.	2013-05-01	10.1371/journal.pone.0064465	accurate identification of viral integration sites	accurate, robust integration site detectoin	only viruses in database	virus	similarity	BLAST, BLAT, Bowtie2, BWA	nt	RINS virus DB, or GIB-V	Bowtie2	either NCBI build 37/36 or UCSC hg19/hg18	-	no	FS(AS/S-pp)	no	no	3 d	fastq/bam	no	reads	8 CPU-HPC	yes	-	https://bioinfo.uth.edu/VirusFinder/VirusFinder-manual.pdf	Linux	Any	medium	http://bioinfo.mc.vanderbilt.edu/VirusFinder/	VirusSeq, ViralFusionSeq	-	-	VIP	-	?	yes	20	Perl, BLAST+, BLAT, Bowtie2, BWA, iCORN, CREST, GATK, SAMtools, SVDetect, Trinity	49	VirusFinder: Software for Efficient and Accurate Detection of Viruses and Their Integration Sites in Host Genomes through Next Generation Sequencing Data	Medical: integration sites	-	-
Metavir 2	Roux et al.	2014-03-19	10.1186/1471-2105-15-76	virome analysis	web server for comprehensive virome analysis	too detailed for diagnostics/clinical use(?)	virus	similarity + composition + phylogeny	BLAST, custom, FastTree	nt	RefSeq virus DB, PFAM	-	-	species	no	SPh	yes (webservice)	yes (tables, charts, contig networks)	h - d?	fasta (compressed possible)	short reads or contigs	reads/contigs	HPC	use yes, download no	GNU GPLv3	http://metavir-meb.univ-bpclermont.fr/index.php?page=Tutorial	Any (webservice)	Any	high (webservice)	http://metavir-meb.univ-bpclermont.fr/	-	ViromeScan	-	-	-	, SEN: 82%, SPEC: <100% (ViromeScan)	no (problems in 2015 seem unresolved)	24	Perl, Php, Javascript, Css, R, BLAST, FastTree, MetaGeneAnnotator, HMMScan, Uclust, jackhmmer, RaphaelSVG, Cytoscope-web	63	Metavir 2: new tools for viral metagenome comparison and assembled virome analysis	Medical: diagnostics	Biodiversity: viruses	Discovery: composition search
VMGAP	Lorenzi et al.	2011-07-01	10.4056/sigs.1694706	functional annotation of viral metagenomes	hiearchical protein annotation	runs only at JCVI	virus	similarity	BLAST, HMMER	aa	GenBank NRDB, GenBank environmental ENV_NT & ENV_NR, UniProtDB, OMNIOMEDB, PFAM, TIGRFAM HMMs, ACLAME HMMs, GenBank CDDDB, pfam2gomappingsDB	-	-	protein	no	SSSSS-pp	no	no (possible to export to Excel or METAREP)	?	protein fasta (translated predicted ORFs)	no	contigs	HPC (grid)	no (only at JCVI)	-	-	?	?	n/a (high when at JCVI)	-	MG-RAST	-	-	Fancello et al. (2012)	-	"more detailed protein annotations than MG-RAST"	no	?	HMMER, BLAST (NCBI-toolkit), SignalP, TMHMM, PRIAM	25	TheViral MetaGenome Annotation Pipeline (VMGAP):an automated tool for the functional annotation of viral Metagenomic shotgun sequencing data	Medical: diagnostics? (only functional annotation)	Biodiversity: viruses (proteins)	Discovery: aa search, broad DB
Exhaustive Iterative Assembly (Virus Discovery Pipeline)	Schürch et al.	2014-08-20	10.1371/journal.pone.0105227	virus recovery, discovery and genome assembly	extensive assembly procedure	only viruses, identification still limited to databases	virus	similarity + phylogeny	BLAST, MAFFT, PhyML	nt, aa	NCBI nt, NCBI nr viral fraction, PFAM, custom	BLASTn	GenBank birds, carnivores, rodents, ruminants	species	no	PAFSPh	no	no	interactive	454	252 (simulated)	reads	?	no	-	-	Linux	454	low (settings are provided, but I see no link to the tool)	-	-	-	-	-	-	?	yes (last publication October 2015)	5	Python, Newbler, GSMapper, CAP3, BLAST, HMMER, MEME, MAST, Bioconductor, R	11	Metagenomic Survey for Viruses in Western Arctic Caribou, Alaska, through Iterative Assembly of Taxonomic Units	Medical: diagnostics, faster (probably possible to deliver result in one day)	Biodiversity: viruses	Discovery: aa search, broad DB
REGA typing tool v3	Pineda-Peña et al.	2013-05-07	10.1016/j.meegid.2013.04.032	HIV-1 genotyping for clinical and surveillance purposes	automated genotyping of HIV-1	slow, low reproducibility (of phylogenetic methods in general)	virus	similarity + phylogeny	BLAST, TreePuzzle	nt	custom	-	-	subtype	no	SPh	yes (webservice)	yes (table, trees)	500 seqs in 5h	fasta (preprocessed)	no	reads/contigs	webserver	yes	GNU GPLv2	http://regatools.med.kuleuven.be/typing/v3/hiv/typingtool/tutorial	Any (webservice)	Any	high	http://regatools.med.kuleuven.be/typing/v3/hiv/typingtool/	-	-	-	-	-	?	no	37	Php, Java, R, TreePuzzle	79	Automated subtyping of HIV-1 genetic sequences for clinical and surveillance purposes: Performance evaluation of the new REGA version 3 and seven other tools	Medical: diagnostics, surveillance/outbreak tracing, faster (probably possible to deliver result in one day)	-	-
VirSorter	Roux et al.	2015-05-28	10.7717/peerj.985	identification of viral sequences in diverse microbial datasets	focus on microbial data, scoring systems, works with prediction confidence categories	optimized for bacterial and archaeal viruses, difficulty with short sequences (< 3 kb), and lacks regular prophage features	virus (bacterial)	similarity	BLASTp, HMMER3	aa	Pfam + custom (iPlant Discovery Environment; from RefSeq)	-	-	kingdom	yes	PS	yes (webservice)	no	?	fasta (contigs)	100 bp paired-end reads, assembled by Idba_ud	contigs	?	yes	GNU GPLv2	https://github.com/simroux/VirSorter	Any	Illumina	high	https://github.com/simroux/VirSorter	PhiSpy, Phage_Finder, PHAST	-	-	-	manual curation of prophages	SEN: 32-97%, PREC: 99-85% (confidence categories 1&2-all categories, all contigs-> 10 kb contigs; 10 simulated metagenomes), SEN: 32-99.8, PREC: >99% (limited contamination metagenomes)	yes (latest commit 20 October 2016)	?	Perl, HMMER3, MCL, MetaGeneAnnotator, MUSCLE, BLAST	34	VirSorter: mining viral signal from microbial genomic data	-	Biodiversity: microbial viruses/phages	Discovery: aa search, broad DB
ProViDE	Ghosh et al.	2011-03-26	PMCID: PMC3082859	accurate classification of viral reads from metagenomes	rank-specific classification criteria	slow, and only viruses	virus	similarity	BLASTx	aa	NCBI nr	-	-	species	no	S	no	no	hours (1hr/100,000 reads - slower than MEGAN)	Sanger, 454	100-800	reads	?	academic, non-profit	custom	-	Linux (Ubuntu/Fedora)	454, Sanger	medium	http://metagenomics.atc.tcs.com/binning/ProViDE/	MEGAN	MetLab	-	Fancello et al. (2012)	-	"better than MEGAN", SEN: 54%, SPEC: 25-26-37-43-53% (MetLab, species-kingdom)	no (last update on site: 2013)	?	Perl, Python	19	ProViDE: A software tool for accurate estimation of viral diversity in metagenomic samples	Medical: diagnostics, faster (probably possible to deliver result in one day)	Biodiversity: viruses	Discovery: aa search, broad DB
GenSeed-HMM	Alves et al.	2016-03-04	10.3389/fmicb.2016.00269	assemble viral genomes for discovery in metagenomic samples, de novo diagnosis, detect emergence of drug-resistance variants, gap closure in assembly finishing projects	progressive assembly with HMM seeds	tested on ssDNA bacteriophage; tested with only a set of assembly tools	any	similarity	BLASTx	aa	reference Microviridae proteins (Roux et al., 2012)	-	-	species	yes	AS	no	no	?	fasta, fastq, sff	>35 bp (101 bp paired-end, 256 bp trimmed)	reads	12 CPU (24 threads) server	yes	GNU GPLv3	https://sourceforge.net/projects/genseedhmm/files	Linux	454, Illumina	medium	https://sourceforge.net/projects/genseedhmm/	Newbler	-	-	-	-	SEN: 52-72%, PREC: 72-100% (for finding Alpavirinae from a VP1-contig-seed)	yes (last modified 13 Oct 2016)	?	HMMER, BLAST, EMBOSS, CAP3, Velvet, Newbler, SOAPDenovo, ABySS	0	GenSeed-HMM: A Tool for Progressive Assembly Using Profile HMMs as Seeds and its Application in Alpavirinae Viral Discovery from Metagenomic Data	Medical: diagnostics	Biodiversity: any metagenome	Discovery: aa search, broad DB
Metavir	Roux et al.	2011-09-01	10.1093/bioinformatics/btr519	virome analysis	web server for comprehensive virome analysis	too detailed for diagnostics/clinical use(?)	virus	similarity + phylogeny	BLASTx, MUSCLE, PhyML, HMMER	nt, aa	RefSeq, PFAM, NCBI nr	-	-	monophyletic groups	no	SASPh	yes (webservice)	yes (tree)	interactive	?	100-400+	reads/contigs	40 CPU-HPC	superceded by newer version	-	http://metavir-meb.univ-bpclermont.fr/index.php?page=Tutorial	Any (webservice)	Any	high (webservice)	http://metavir-meb.univ-bpclermont.fr/	-	-	-	Fancello et al. (2012)	-	?	no (problems in 2015 seem unresolved)	48	MUSCLE, CAP3, Gblocks, PhyML, Scriptree	88	Metavir: a web server dedicated to virome analysis	-	Biodiversity: viruses	Discovery: aa search, broad DB
RINS	Bhaduri et al.	2012-02-01	10.1093/bioinformatics/bts100	identify non-human sequences	fast host filtering - low RAM requirement (for desktop use) - similar to PathSeq	installation of dependencies	non-human	similarity	BLAT, BLAST	nt	custom virus db(?)	Bowtie	human genome	family	no	SPFAS	no	no	~ 3 h (2CPU), ~15 min (16CPU)	fastq?	36-500 paired-end	reads	PC (2 CPU, 8 GM RAM)	yes	-	supplied with download(?)	Linux	Mate-paired 36-500 bp	low-medium	http://khavarilab.stanford.edu/tools-1/#tools	PathSeq	READSCAN, CaPSID, ClinicalPathoScope, Virana	-	RIEMS	PCR + Sanger sequencing	SEN: 100%; SEN: 94-88-55-25-5-1%, SPEC: 99.99% (0-1-5-10-20-30% mutated, Readscan); SEN: 0-20-66-100% (25-10-5-0% mutated, CaPSID); SEN: 0-56-84-95%, PREC: 100 (25-10-5-0% mutated, Virana)	no (website has moved, but is still online)	32	Blat, Bowtie, Trinity, BLAST	51	Rapid identification of non-human sequences in high-throughput sequencing datasets	Medical: diagnostics	Biodiversity: human pathogens	-
FACS	Stranneheim et al.	2010-05-13	10.1093/bioinformatics/btq230	read classification/filter	Bloom filters	best suited to removal of known sequences	any	similarity (exact match k-mers)	Bloom filter	nt	custom	-	-	species	limited	S	no	no	"~20 times faster than BLAT/SSAHA2"	?	269 average	reads	?	yes	MIT	https://github.com/SciLifeLab/facs	Linux	454	high	https://github.com/SciLifeLab/facs	BLAT, SSAHA2	-	-	-	-	SEN: 98.1-99.8%, SPEC: 100-100%	yes (last commit 17 Dec 2015)	22	Perl; C	39	Classification of DNA sequences using Bloom filters	Medical: diagnostics, faster (probably possible to deliver result in one day)	Biodiversity: any metagenome	-
QuasQ	Poh et al.	2013-12-05	10.1186/1471-2105-14-355	genome recovery, quasispecies estimation	quasispecies identification	454 sequencing, viruses with good references	virus	similarity	Bowtie2	nt	"the reference genome"	-	-	quasispecies	no	PS-pp	no	no	?	454	330 average	reads	?	yes	-	http://www.statgen.nus.edu.sg/~software/quasq.html	Linux, Mac OS	454	low (separate dependencies, tarball)	http://www.statgen.nus.edu.sg/~software/quasq.html	ShoRAH, ViSpA, PredictHaplo, QuRe, QuasiRecomb	-	-	-	-	SEN: 99-100, PREC: 98-100% (in 8 tests), SEN: 30-100, PREC: 0-19 (in 8 benchmark simulations)	no ("Last updated 10 Jul 2014")	0	Perl, Bowtie2	5	Viral quasispecies inference from 454 pyrosequencing	-	Biodiversity: viral quasispecies	-
Clinical PathoScope	Byrd et al.	2014-08-01	10.1186/1471-2105-15-262	pathogen identification for clinical specimens	few dependencies, rapid, clinically relevant	no assembly, limited to DB	pathogens	similarity	Bowtie2	nt	NCBI bacterial, NCBI viral	Bowtie2	human GRCh37/hg19, GenBank human rRNA	species	limited	SFS	no	no	< 1 h	fastq (pre-processed)	100 to target, 50 to host, 100 to non-target, full read to target	reads	?	yes	GNU GPLv3	https://sourceforge.net/p/pathoscope/wiki/clinical_pathoscope/	Any	Any	medium-high (depends on installation success and database availability)	https://sourceforge.net/projects/pathoscope	RINS, READSCAN, CloVR-metagenomics, IMSA, LMAT, metAMOS	RIEMS	-	-	-	?, SEN: 0-93% (RIEMS)	yes (last update: 13-12-2015)	7	Python, Bowtie2	21	Clinical PathoScope: rapid alignment and filtration for accurate pathogen identification in clinical samples using unassembled sequencing data	Medical: diagnostics, faster (probably possible to deliver result in one day)	Biodiversity: human pathogens	-
ViromeScan	Rampelli et al.	2016-03-01	10.1186/s12864-016-2446-3	virome profiling	fast and unique 2-step filtering	no assembly, no novel viruses	virus	similarity	Bowtie2	nt	NCBI (several custom options)	BMTagger	hg19	species	no	SPFFS	no	yes (tables, graphs)	140 sequences/s/CPU	fastq (compressed possible)	> 60	reads	PC	yes	FreeBSD	https://sourceforge.net/projects/viromescan/files/?source=navbar	Linux, Mac OS	Any	medium-high (depends on installation success)	https://sourceforge.net/projects/viromescan/	Metavir, BLASTn	-	-	-	-	SEN: 100%, PREC: 100%	yes	?	Bash, R, Perl, Java, Bowtie2, Bmtagger, Picard	4	ViromeScan: a new tool for metagenomic viral community profiling	Medical: diagnostics, faster (probably possible to deliver result in one day)	Biodiversity: viruses	-
DUDes	Piro et al.	2016-03-05	10.1093/bioinformatics/btw150	metagenomics taxonomic profiling/pathogen detection	novel top-down taxonomy, works with low abundance/partial datasets	still requires quite some manual work	metagenomes/pathogens	similarity	Bowtie2	nt	NCBI GenBank? (DUDesDB)	-	-	species/subtype	limited	S-pp	no	no	15-30 min	fastq?	no	reads	?	yes	-	https://sourceforge.net/projects/dudes/files/README.md/download	Linux	Any	medium-high (depends on installation and databases)	http://sf.net/p/dudes	GOTTCHA, Kraken, MetaPhlAn2	-	-	-	-	? (only bacteria scores)	yes	?	Python, Bowtie2	3	DUDes: a top-down taxonomic profiler for metagenomics	Medical: diagnostics, surveillance/outbreak tracing, faster (probably possible to deliver result in one day)	Biodiversity: any metagenome	-
IMSA+A	Cox et al.	2017-01-19	10.1186/s40168-016-0219-5	metatranscriptome classification for bacteria, fungi and viruses in the same sample	efficient and robust classification of different pathogens in the same sample	focus on transcriptome	pathogens	similarity	Bowtie2	nt	"the reference genome"	-	-	quasispecies	no	FAS	no	no	?	fasta, fastq (all reads are treated as single)	no	reads	?	yes	GNU GPL/CC-ANCSA Intl Public Licence	https://github.com/JeremyCoxBMI/IMSA-A/blob/master/IMSA%2BA_Detailed_Direction.pdf	Linux	Any	medium	https://github.com/JeremyCoxBMI/IMSA-A	MEGAN CE + BLAST/DIAMOND, Kraken	-	-	-	-	SEN: 97%, FDR: 14% (count >0), SEN: 95-99%, FDR: 5-8% (Refseq-custom DB), SEN: 98-100%, FDR: 3-13% (Oases-Inchworm assembly; "first taxon level")	yes	?	Python, IMSA, BLAST+, BLAT, Bowtie2, Oases, velvet, Trinity	0	A fast and robust protocol for metataxonomic analysis using RNAseq data	-	Biodiversity: metatranscriptome of pathogens	-
VIP	Li et al.	2016-03-30	10.1038/srep23774	virus identification and discovery	fast virus discovery, suitable for desktop use and diagnostics purposes	?	virus	similarity + phylogeny	Bowtie2, RAPSearch2 (depending on mode), MAFFT, ETE	nt, aa (depending on mode)	ViPR + IRD, or RefSeq + neighbors depending on mode; and NCBI human DB	Bowtie2	GRCh38/hg38, RefSeq rRNA, RefSeq, RefSeq mDNA; and bacterial DB from GOTTCHA	subtype	yes	PFSAPh	no	yes (trees, coverage map)	< 2 d?	fast(a/q), (s/b)am	125 (simulated)	reads	PC	yes	GPLv3	https://github.com/keylabivdc/VIP	Linux (Ubuntu, Biolinux)	454, Ion Torrent, Illumina	high (clone from github)	https://github.com/keylabivdc/VIP	EnsembleAssembler, IDBA_UD	-	-	SURPI (	"independent confirmatory testing results"	?	yes	1	Shell, Python, Perl, PICARD, Bowtie2, MAFFT, Velvet-Oases, RAPSearch2, ETE	5	VIP: an integrated pipeline for metagenomics of virus identification and discovery	Medical: diagnostics, surveillance/outbreak tracing	Biodiversity: viruses	Discovery: aa search
MetaShot	Fosso et al.	2017-01-27	10.1093/bioinformatics/btx036	classification of host-associated microbiome	extract unassigned reads	slower than comparable tools	metagenomes	similarity	Bowtie2, TANGO	nt	NCBI and RefSeq (bacteria, viruses, fungi (from Plantae), invertebrates)	STAR	hg19, GRCh37, 2009	species	no	PFS	no	yes (HTML & Krona)	2-3x slower than Kraken-MetaPhlAn2	paired-end Illumina	no	reads	?	yes	GNU GPLv3	https://github.com/bfosso/MetaShot/blob/bfosso-patch-1/MetaShot%20User%20Guide.pdf	Linux	Paired-end Illumina	medium	https://github.com/bfosso/MetaShot	Kraken, MetaPhlAn2	-	-	-	-	SEN: 97-98%, PREC: 97-100%	yes	?	Python, Bash, FaQCs, STAR, Bowtie2, TANGO	0	MetaShot: an accurate workflow for taxon classification of host-associated microbiome from shotgun metagenomic data	Medical: diagnostics, faster (probably possible to deliver result in one day)	Biodiversity: host-associated	-
VirVarSeq	Verbist et al.	2014-08-26	10.1093/bioinformatics/btu587	variant calling for predicting antiviral resistances	codon-level quality control	only well-studied viruses	virus	similarity	BWA	nt	custom ("a reference sequence", supplementary n/a (14-02-2017))	-	-	quasispecies	no	SS-pp	no	no	?	Illumina fastq	181 bp fragments in plasmids - supplementary n/a (14-02-2017)	reads	?	yes	-	https://sourceforge.net/projects/virtools/files/?source=navbar	Linux, Mac OS	Illumina	medium	http://sourceforge.net/projects/virtools/?source=directory	LoFreq, V-phaser, ShoRAH	-	-	Posada-Cespedes et al (2016), 10.1016/j.virusres.2016.09.016	-	?	no (last update 29-9-2014)	?	BWA, Q-cpileup, R, Fortran, Perl	13	VirVarSeq: a low-frequency virus variant detection pipeline for Illumina sequencing using adaptive base-calling accuracy filtering	Medical: diagnostics, surveillance/outbreak tracing	Biodiversity: viral quasispecies	-
GOTTCHA	Freitas et al.	2015-03-12	10.1093/nar/gkv180	accurate metagenome classification	fast, low FPs, custom DB	?	bacteria, virus	similarity	BWA (mem)	nt	custom	-	-	species	limited (not tested with real data)	PS-pp	no	no	~ 4 h? ("2-5x slower than Kraken")	fastq	fragmented to 30 bp (terminal ends <60 are retained)	reads	16 CPU-HPC, PC	yes	GNU GPLv2	https://github.com/LANL-Bioinformatics/GOTTCHA	Linux, Mac OS	Any	high	https://github.com/LANL-Bioinformatics/GOTTCHA	BLASTn, BWA, MetaPhlAn, mOTUs, Kraken-mini	-	Lindgreen et al. (2016)	-	-	SEN: 91%, FDR: 0-17%, F: 86-100%; SEN: 55-58 , SPEC: 95-100 , MCC: 43-40 (genys-phylum, Lindgreen)	yes (last commit 17 July 2015)	8	Perl, BWA	31	Accurate read-based metagenome characterization using a hierarchical suite of unique signatures	Medical: diagnostics, faster (probably possible to deliver result in one day)	Biodiversity: any metagenome	-
ViralFusionSeq	Li et al.	2013-01-01	10.1093/bioinformatics/btt011	discover viral integration and resonstruct fusion transcripts at single-base resolution	viral integration site discovery and viral expression at single-base resolution	only viral integration	virus	similarity	BWA, BLAST	nt	"viral sequences and human decoy sequences"	-	-	-	no	PS	no	no	> 1 week	RNA-seq?	no	reads	HPC?	yes	GNU GPLv3	supplied with download	Linux	Illumina	low-medium	https://sourceforge.net/projects/viralfusionseq/	-	-	-	-	Sanger sequencing	?	no (website cannot be reached at the moment)	20	Perl, BWA, BLAST	31	ViralFusionSeq: accurately discover viral integration events and reconstruct fusion transcripts at single-base resolution	Medical: integration sites	-	-
Taxy-Pro	Klingenberg et al.	2013-02-15	10.1093/bioinformatics/btt077	more sensitive detection of under-represented organisms (Archaeae and viruses)	protein-profile based, two indices to assess quality	restricted to CDS, depends on (limited) Pfam, CoMet less sensitive than HMMER3, not suitable as stand-alone - needs complementation	metagenomes	similarity	CoMet	aa	Pfam + metagenomes	-	-	superkingdom, phylum(, class)	no	S	no	no	"about three orders of magnitude faster than speed-optimized BLAST"	fastq?	450 bp simulated 454 reads, public datasets (HMP, Oil Seep)	reads	PC	yes	-	-	Any (webservice or MATLAB)	454, Illumina	high	http://gobics.de/TaxyPro/	(NBC, PhymmBL,) BLASTN+LCA, MEGAN, MG-RAST, WebCARMA, (MetaPhyler,) CombiBLAST(, Taxy)	-	-	-	-	?	no (files last modified 2013)	?	MATLAB, CoMet webserver	14	Protein signature-based estimation of metagenomic abundances including all domains of life and viruses	-	Biodiversity: viruses and Archaeae	Discovery: aa search, broad DB
NBC	Rosen et al.	2010-11-08	10.1093/bioinformatics/btq619	classification of metagenomic reads	easy to use webserver for phylegenetic analysis; novice and expert settings, classifies every read	long runtimes?, classifies everything - potentially high FPR	any	composition (N-mer frequency profiles)	custom	nt	"unique N-mer frequency profiles of 635 microbial genomes"	-	-	species	limited	S	yes (webservice)	no	~ 21 h	fasta (compressed possible)	230 average	reads	webserver/PC	yes	-	http://nbc.ece.drexel.edu/tutorial.php	Any (webservice)	Any	medium-high (medium for local installation, high for webserver)	http://nbc.ece.drexel.edu/	MG-RAST, Galaxy, CAMERA, WebCARMA, PhyloPythia	Kraken, Taxy-Pro, MetLab	Garcia-Etxebarria et al. (2014)	-	-	SEN: 100% classified (no positive/negative assessment); PREC: 78-97%, SEN: 78-97% (Kraken, genus), SEN: 100, SPEC: 2-17-46-49-50% (MetLab, species-kindgom)	no (no date provided on website, publication from 2011)	60	Perl, C++	125	NBC: the Naive Bayes Classification tool webserver for taxonomic classification of metagenomic reads	-	Biodiversity: any metagenome	Discovery: composition search
LMAT	Ames et al.	2013-09-15	10.1093/bioinformatics/btt389	classification of sequencing reads as fast as they are produced by the sequencing machine	scale with supercomputer	very high RAM requirement and decreased sensitivity(?)	any	similarity (match k-mers)	custom	nt	NCBI microbial genomes	-	-	species	limited	S-pp	no	no	1.3 Mbp/s	Illumina?	36-200	reads	HPC (high RAM)	yes	-	-	Linux	Any	low	https://sourceforge.net/projects/lmat/	PhymmBL, MetaPhlAn, Genometa	ClinicalPathoScope	Lindgreen et al. (2016)	-	-	SEN: 56-93%, PREC: 100 (novel-known genomes); SEN: 70-65 , SPEC: 75-75 , MCC: 45-30 (genus-phylum, Lindgreen)	yes (last update: 7-5-2015)	24	gcc, Python, OpenMP, MPI	64	Scalable metagenomic taxonomy classification using a reference genome database	-	Biodiversity: any metagenome	-
SMART	Lee et al.	2016-07-28	10.1186/s12859-016-1159-6	classification of complex sequence populations	parallelization with 256 search programs, efficiently match against all species in GenBank	high RAM requirements with multiple CPUs	metagenomes	similarity (256 search programs)	custom	nt	NCBI GenBank (v209)	-	-	species	no	S	no	no	< 10 min or ~2 M reads/min (on HPC - 192 CPUs)	fast(a/q)	no	reads	HPC	for academic use	Academic Licence	https://bitbucket.org/ayl/smart	Linux	Illumina	low-medium (instructions, but dependencies)	https://bitbucket.org/ayl/smart	Kraken, CLARK	-	-	-	-	SEN: 70-80, PREC: 90-100% (species-class, HiSeq-simBA5)	yes (May 2016)	?	C++, Ruby, Flash, Sickle, Google SparseHash, GNU parallel	4	Scalable metagenomics alignment research tool (SMART): a scalable, rapid, and complete search heuristic for the classification of metagenomic sequences from complex sequence populations	Medical: diagnostics, faster (probably possible to deliver result in one day)	Biodiversity: any metagenome	-
MEGAN Community Edition	Huson et al.	2016-06-21	10.1371/journal.pcbi.1004957	taxonomic and functional profiling	interactive, integrated pipeline with GUI	no viruses tested	metagenomes	similarity	DIAMOND	aa	NCBI NR	-	-	species	limited	S-pp	yes	yes (dendrograms, PCoA plots, tables)	hours per sample on a server (~5.5 h)	Illumina	100 bp paired end	reads	HPC (32 CPU) tested, PC is possible	yes	GNU GPLv3	http://ab.inf.uni-tuebingen.de/data/software/megan6/download/manual.pdf	Any	Illumina	high	http://ab.inf.uni-tuebingen.de/data/software/megan6/download/welcome.html	-	-	-	-	-	(see MEGAN 4)	yes (last commit 16 November 2016)	?	Java, DIAMOND, InterPro2GO, SEED viewer, eggNOG viewer, KEGG	22	MEGAN Community Edition - Interactive Exploration and Analysis of Large-Scale Microbiome Sequencing Data	Medical: diagnostics, faster (probably possible to deliver result in one day)	Biodiversity: any metagenome	Discovery: aa search, broad DB
metaViC	Modha et al.	2016-08-24	https://www.biostars.org/p/208356/	virus metagenomics for when no host genome is available	needs no host genome to remove host sequences		virus	similarity	DIAMOND	aa	RefSeq-Protein	RiboPicker	-	species	no	PFSAS	no	yes (Krona)	?	paired-end fastq	no	reads	?	yes	GNU GPLv3	-	Linux, Mac OS	Any	low-medium (all dependencies are mentioned, but there are no instructions)	https://github.com/sejmodha/metaViC	-	-	-	-	-	?	yes (Aug 2016)	?	Bowtie2, DIAMOND, filter_fastq.pl, GARM, IDBA-UD, Kronatools, prinseq, QUAST, riboPicker, SPAdes, Trim Galore	NA	metaViC: Virus metagenomics pipeline for unknown host or in absence of a host genome	Medical: diagnostics	Biodiversity: viruses	Discovery: aa search
RIEMS	Scheuch et al.	2015-03-01	10.1186/s12859-015-0503-6	sensitive classification of metagenomics datasets	high sensitivity and local installation for confidential samples	long computation time	metagenomes	similarity	GS Mapper, BLAST	nt, aa	NCBI nt/nr	-	-	species	no	PASAS(SS)	no	no	10 h (24 CPU-HPC)	sff, fastq, fasta	no	reads	24 CPU-HPC	yes	GNU GPLv3	-	Linux	454, Ion Torrent, Illumina	low-medium (validation data available, but no instructions)	https://www.fli.de/en/institutes/institut-fuer-virusdiagnostik/labore-arbeitsgruppen/labor-fuer-ngs-und-microarray-diagnostik/	Clinical PathoScope, Kraken	-	-	-	-	SEN: 13-100%, SPEC: 100%, PREC: 100%	no (website moved, no date provided)	2	Bash, 454 genome sequencer software suite, Newbler, GS mapper, sff/fna tools, BLAST, Emboss	11	RIEMS: a software pipeline for sensitive and comprehensive taxonomic classification of reads from metagenomics datasets	Medical: diagnostics	Biodiversity: any metagenome	Discovery: aa search, broad DB
ClassyFlu	Van der Auwera et al.	2014-01-03	10.1371/journal.pone.0084558	classification (typing) of Influenza A	profile HMMs for Influenza A typing	only Influenza A	Influenza A	similarity	HMMER	nt	custom (from NCBI Influenza Virus Resource)	-	-	subtype	no	S	yes (webservice)	no	?	fasta	1.7 kb	contigs	webservice	yes	GNU GPLv3	supplied with download	Any (webservice); or Linux, Mac OS	Any	high (web); medium-high (local?)	http://bioinf.uni-greifswald.de/ClassyFlu/query/init	IRD-CT, "manual BLAST + phylogeny"	-	-	-	-	up to 97% concordance with "gold standard" (IRD-CT)	no (last modified 24 Sep 2013)	?	HMMER	0	ClassyFlu: Classification of Influenza A Viruses with Discriminatively Trained Profile-HMMs	Medical: diagnostics, surveillance/outbreak tracing	-	-
vFam	Skewes-Cox et al.	2014-08-20	10.1371/journal.pone.0105067	detect viruses in metagenomic data	profile HMMs for viruses	less suited for closely related sequences	virus	similarity	HMMER	aa	RefSeq (virally annotated proteins)	-	-	species	limited	S	no	no	?	fasta	100, 240, 253 nt (averages of 3 datasets)	reads	?	yes	-	-	Linux, Mac OS	Any	high (requires only HMMER, but further instructions seem to be absent)	http://derisilab.ucsf.edu/software/vFam/	BLAST	-	-	-	compared to previous studies	SEN: 4-74%, PREC: 3-73%, FDR: 0.1-2%	no (last modified 12 Feb 2014)	?	HMMER(, CD-HIT, MCL, MUSCLE, BLAST)	19	Profile Hidden Markov Models for the Detection of Viruses within Metagenomic Sequence Data	Medical: diagnostics	Biodiversity: viruses	Discovery: aa search, broad DB
Taxonomer	Flygare et al.	2016-05-26	10.1186/s13059-016-0969-1	end-to-end universal metagenomics	integrated nucleotide and protein-based classification and simultaneous host mRNA transcript profiling	requires lot of RAM?	pathogens	similarity (exact match k-mers)	KAnalyze + custom k-mer matching	aa	UniRef90 (viruses)	KAnalyze	subsets of Greengenes (bacteria), UNITE (fungi), UniRef50 (bacteria), and ENSMBL human reference sequence	species, strain	yes	FFSS-pp	yes/no (webservice/local installation)	yes	"real-time, interactive" - < 10 min	fasta, fastq	2x100, 2x250, 139	reads	HPC	yes	MIT	http://taxonomer.iobio.io/instructions.html	Any (webservice), or Linux, Mac OS	Any	high (webserver or clone github)	https://www.taxonomer.com/	Kraken, SURPI, RAPSearch2, DIAMOND	-	-	-	-	SEN: 88-99.9%, SPEC: 90.7%	yes	2	Cython, KAnalyze	16	Taxonomer: an interactive metagenomics analysis portal for universal pathogen detection and host mRNA expression profiling	Medical: diagnostics, surveillance/outbreak tracing, faster (probably possible to deliver result in one day)	Biodiversity: any metagenome	Discovery: aa search, broad DB
Kraken	Wood & Salzberg	2014-03-03	10.1186/gb-2014-15-3-r46	metagenomic classification	very fast, possible to combine with other tools or use as "host filter"	need much RAM	metagenomes (mostly bacteria)	similarity (exact match k-mers)	Kraken	nt	NCBI RefSeq microbial, or GenBank genomes for bacteria and archaea	-	-	Genus, species	limited	S-pp	no (Illumina BaseSpace integration?)	no	~ 1 h	fasta (fastq with special switch)	no	reads	HPC	yes	GNU GPLv3	http://ccb.jhu.edu/software/kraken/MANUAL.html	Linux	Any	high	https://github.com/DerrickWood/kraken	MegaBlast, PhymmBL, NBC, MetaPhlAn	MetaShot, IMSA+A, Taxonomer, DUDes (only bacteria), GOTTCHA, RIEMS, SMART	Peabody et al. (2015), Lindgreen et al. (2016)	-	-	SEN: 65-94%, PREC: 95-100% (genus), SEN: 73-100%, PREC: 99% (MetaShot), SPEC: 23% (IMSA+A), SEN: 66-99.6% (Taxonomer), SEN: 15-75%, PREC: 63-92% (212-20 genomes/sample, Illumina 100nt se-454 350 nt se), SEN: 26-61%, PREC: 76-96% (Genus-phylum averaged, Kaiju), SEN: 100%, FDR: 56-95%, F: 9-61% (GOTTCHA), SEN: 1-100% (RIEMS), SEN: 30-88%, PREC: 30-100 (species-class, HiSeq-simBA5, SMART), SEN: 88-9…	yes (oldest update 1 year before 18-04-2016)	88	C++, Perl	334	Kraken: ultrafast metagenomic sequence classification using exact alignments	Medical: diagnostics, faster (probably possible to deliver result in one day)	Biodiversity: any metagenome	-
MetLab	Norling et al.	2016-08-01	10.1371/journal.pone.0160334	"provide virologists with an easy to use tool for designing, simulating and analyzing viral metagenomes"	complete from study design to analysis, with GUI	not yet for Windows	virus	similarity (exact match k-mers + profile alignment)	Kraken, HMMER3	nt, aa	GenBank viral+phage, RefSeq Bacteria+Archaeae, vFams	Bowtie2	"host genome" (human)	species	no	P(F)(A)SS	yes	yes (Krona)	< 40 min	"raw NGS"	no	reads	any UNIX-like	yes	GNU GPLv3	https://github.com/norling/metlab/blob/master/INSTALL.md	Any	Any	medium (few dependencies and documentation available)	https://github.com/norling/metlab	Kraken, Megan (DIAMOND), RAIphy, ProViDE, NBC	-	-	-	-	(uses Kraken)	yes (June 2016)	?	Python (2.7) + libraries, GNU MPFR, Prinseq-Lite, Bowtie2, SAMTOOLS, SPAdes, Krona Tools, Kraken, FragGeneScan, HMMsearch, vFamParse	0	MetLab: An In Silico Experimental Design, Simulation and Analysis Tool for Viral Metagenomics Studies	Medical: diagnostics, faster (probably possible to deliver result in one day)	Biodiversity: viruses	Discovery: aa search, broad DB
SRSA	Isakov et al.	2011-06-11	10.1093/bioinformatics/btr349	pathogen identification using short RNA subtraction and assembly	short RNA	short RNA from human host	human pathogens	similarity	Megablast	nt	All non-redundant GenBank CDS translations+PDB+SwissProt+PIR+PRF'	BWA	NCBI hg19	species	no	PFAS-pp	no	no	?	"all types of current sequencing platforms"	34 average	reads	?	upon request	-	-	Linux	Illumina	medium	-	-	-	-	-	-	?	no	?	BWA, fastx_toolkit, BLAST, MegaBlast, Velvet	40	Pathogen detection using short-RNA deep sequencing subtraction and assembly	Medical: diagnostics	Biodiversity: human pathogens	-
MePIC	Takeuchi et al.	2014-01-01	10.7883/yoken.67.62	pathogen identification for clinical specimens	easy cloud-pipeline "for dummies"; counts human hits but does not filter them	limited by DBs, tailored for clinical use	pathogens	similarity	Megablast	nt	NCBI nt	BWA	UCSC/NCBI hg19	species	no	PFS	yes (webservice)	no	10 h on 1 CPU, 6 min on 100 CPUs (Megablast only)	fastq	200(?)	reads	HPC	use yes, download upon request	-	https://mepic.nih.go.jp/mepic/manual/	Any (webservice)	Illumina	high (web-based)	https://mepic.nih.go.jp/	-	-	-	-	-	?	no (website does not work with local Firefox, which is v45 (newest as of 18-04-2016))	6	fastq-mcf (ea-utils), BWA, Megablast	15	MePIC, Metagenomic Pathogen Identification for Clinical Specimens	Medical: diagnostics	Biodiversity: pathogens	-
EnsembleAssembler	Deng et al.	2015-01-04	10.1093/nar/gkv002	assembly of metagenomes	validated metagenome assembly	focus more on contigs than species recovery	metagenomes (especially microbes/viruses)	similarity	Megablast	nt, aa	NCBI RefSeq?	Bowtie2	UCSC/NCBI hg19	species	yes	FPAS	no	no	< 5 minutes (on 8 CPU server)	Illumina	>100	reads	8 CPU-HPC, local should be possible on workstation	yes	-	https://github.com/xutaodeng/EnsembleAssembler	Linux	Any	low-medium (delivers separate tools, with settings to use, rest is to the user)	https://github.com/xutaodeng/EnsembleAssembler	-	VIP	-	-	-	?, 73-99% (VIP, contig coverage)	yes (latest commit 30 November 2014)	11	Python, SoapDenovo, ABySS, MetaVelvet, Cap3, MegaBLAST, Bowtie2, VecScreen	41	An ensemble strategy that significantly improves de novo assembly of microbial genomes from metagenomic next-generation sequencing data	Medical: diagnostics, faster (probably possible to deliver result in one day)	Biodiversity: any metagenome	Discovery: aa search, broad DB
VirusSeq	Chen et al.	2012-11-17	10.1093/bioinformatics/bts665	identify viral integration sites in human cancer tissue	MOSAIK aligner	only viruses in database	virus	similarity	MOSAIK	nt	GIB-V, hg19Virus (hg19 + TCGA cancer-associated viruses)	MOSAIK	hg19 (UCSC)	-	no	FS	no	no	> 1 week	fastq	paired-end reads	reads	HPC?	yes	-	-	Linux, Mac OS	Paired-end Illumina	low-medium	http://odin.mdacc.tmc.edu/~xsu1/VirusSeq.html	-	-	-	-	serology, colorimetric in situ hybridization, immunohistochemistry	?	no	24	Perl, MOSAIK	50	VirusSeq: software to identify viruses and their integration sites using next-generation sequencing of human cancer tissue	Medical: integration sites	-	-
CaPSID	Borozan et al.	2012-08-17	10.1186/1471-2105-13-206	pathogen identification in human tumor genomes and transcriptomes	MongoDB with sequence DBs, results and metadata; for collaborative projects	made for tumors	pathogens	similarity	Novoalign/Bowtie2 (any)	nt	UCSC/NCBI GRCh37/hg19 + viral + microbial + fungal genomes; or custom from GenBank	same as search	UCSC/NCBI GRCh37/hg19 or custom	species	no	S	yes	yes (coverage maps, result tables)	~ 20 min	bam	65	reads	16 CPU, 5 GB (can run on desktop)	yes	GNU GPLv3	https://github.com/capsid/capsid/wiki	Linux, Mac OS	Any	medium-high	https://github.com/capsid/capsid	RINS	Virana	-	-	in vitro validation	SEN: 1-65-95.5-100% (25-10-5-0% mutated), SPEC: 100%; SEN: 2-65-95-100%, PREC: ~100% (25-10-5-0% mutated, Virana)	no (last update 2 Jun 2012)	?	Python 2.7, MongoDB, OpenJDK, BioPython, pysam, Novoalign, BioScope, JBrowse, Groovy-Grails	26	CaPSID: A bioinformatics platform for computational pathogen sequence identification in human genomes and transcriptomes	Medical: diagnostics, faster (probably possible to deliver result in one day)	Biodiversity: human cancers	-
SURPI	Naccache et al.	2014-06-01	10.1101/gr.171934.113	rapid pathogen identification in clinical samples	fast and accurate enough for clinical use	?	pathogens	similarity	RAPSearch2, SNAP	nt, aa	NCBI viral nucleotides & proteins, RefSeq bacterial DB >100 bp sequences; NCBI nt	SNAP	GRCh37/hg19, RefSeq: rRNA, mRNA, mtRNA	species	yes	PFS(AS)	no	yes (coverage maps and pie charts)	~ 1 h (fast), ~ 5 h (comprehensive)	fastq (raw)	75	reads	64 CPU-HPC/Amazon WS	yes	BSD	https://github.com/chiulab/surpi	Linux	Any	low-medium (only tested on Ubuntu 12.04)	https://github.com/chiulab/surpi	BLAST, BWA, Bowtie2, SNAP, RAPSearch	Taxonomer	-	RIEMS	-	SEN: 84-99%, SPEC: 100%; SEN: 78-99.9% (Taxonomer)	yes (last commit June 2015)	55	Perl, Pyton, cutadapt, prinseq, gt sequniq, SNAP, fqextract, ABySS, Minimo, RAPSearch2, seqtk. \\Bash, Python, Perl, fastQValidator, Minomo, Abyss, RAPSearch2, seqtk, SNAP, gt-sequniq, fastq, cutadapt, prinseq-lite, dropcache	128	A cloud-compatible bioinformatics pipeline for ultrarapid pathogen identification from next-generation sequencing of clinical samples	Medical: diagnostics, faster (probably possible to deliver result in one day)	Biodiversity: pathogens	Discovery: aa search, broad DB
READSCAN	Naeem et al.	2012-11-28	10.1093/bioinformatics/bts684	pathogen discovery	"fast and scalable", portable to any computer type	limited to human viruses	pathogens	similarity	SMALT	nt	?	SMALT	?	species	no	S	no	no	< 27 min on 16 CPU-HPC - 4 h	Illumina/454/SOLiD	no	reads	"portable from laptop to HPC-cluster"	yes	GNU GPLv3	http://www.cbrc.kaust.edu.sa/readscan/, supplied with download - in scripts	Linux	Any	low-medium	http://cbrc.kaust.edu.sa/readscan/	RINS, PathSeq	Clinical PathoScope	-	RIEMS	-	SPEC: 99.99%, SEN: 100-100-88-44-4-0 (0-1-5-10-20-30% mutated)	no	18	Perl, SMALT, Makeflow	30	READSCAN: a fast and scalable pathogen discovery program with accurate genome relative abundance estimation	Medical: diagnostics, faster (probably possible to deliver result in one day)	Biodiversity: human viruses	-
Virana	Schelhorn et al.	2013-10-03	10.1371/journal.pcbi.1003228	detect viral transcripts in human cancers	finding lowly abundant viruses and chimeric reads, and highly divergent viral reads	lower sensitivity than other tools when viral divergence is low	virus	similarity + phylogeny	STAR(, BLAST, LASTZ)	nt	NCBI reference virus genomes, Repbase endogenous retroviruses	STAR	UCSC human genome (hg19, GRCh37), Ensembl human cDNA	species	limited	PS(A)(S)Ph	no	no	~ 30 min/CPU	fastq?	36, 54, 95, 100	reads	PC	yes	Apache licence	https://github.com/schelhorn/virana	Linux, Mac OS	Paired-end Illumina	medium-high (self-install may be difficult, but Galaxy should run with no problem	https://github.com/schelhorn/virana	CaPSID, RINS	-	-	-	FISH, Southern blot	SEN:15-79-85-88%, PREC: 50-85-86-87 (25-10-5-0% mutated)	no (last commit 2 years ago: July 2014)	7	Python, STAR, BWA-mem, LASTZ, RazerS3, Jalview(, plumbum, numpy, biopython, pysam, ftputil, HTSeq, matplotlib, bx-python)	9	Sensitive Detection of Viral Transcripts in Human Tumor Transcriptomes	Medical: diagnostics, faster (probably possible to deliver result in one day)	Biodiversity: human viruses	-
																																										43	46	24
																																										19	biod+disc:	24
